# Supplementary material for: Predicting re-emergence times of dengue epidemics at low reproductive numbers: DENV1 in Rio de Janeiro, 1986–1990
Source: PubMed Central journal article supplement (PMC7328382; doi:10.1098/rsif.2020.0273), 2020-06-24
Supplement: rsif20200273supp2.pdf [file rsif20200273supp2.pdf]

Predicting re-emergence times of dengue epidemics at low  
reproductive numbers: DENV1 in Rio de Janeiro, 1986-1990.  
Supporting Information: Supplemental Tables

Rahul Subramanian, Victoria Romeo-Aznar,  
Edward Ionides, Claudia T. Codeço, and Mercedes Pascual

April 2, 2020

## Contents

|          |                            |          |
|----------|----------------------------|----------|
| <b>1</b> | <b>Supplemental Tables</b> | <b>2</b> |
| 1.1      | Table ST1 . . . . .        | 2        |
| 1.2      | Table ST2 . . . . .        | 3        |
| 1.3      | Table ST3 . . . . .        | 4        |

# 1 Supplemental Tables

## 1.1 Table ST1

|              | MLE Value  |
|--------------|------------|
| sigma_P      | 0.00019    |
| gamma        | 0.05882353 |
| phi          | 1.159567   |
| sigma_M      | 0.5750731  |
| rho          | 0.02754872 |
| Beta_0       | 0.06863794 |
| delta        | 0.6458656  |
| mu_H         | 3.68e-05   |
| N_0          | 5281842    |
| I_0          | 220312.8   |
| R_0          | 0          |
| C_0          | 0          |
| r            | 0          |
| omega        | 0.01721421 |
| epsilon      | 0          |
| LL           | -165.8182  |
| seed         | 338719557  |
| Profile_Type | sigma_P    |
| t0           | 120        |

Table 1: . MLE Parameter Values for SIR Cosine Model.

## 1.2 Table ST2

|                                  | SIR_Cosine | SIR_Spline | SEIR_Spline |
|----------------------------------|------------|------------|-------------|
| min_Sigma_P_profile_2_LL_bound   | 0.00       | 0.00       | 0.00        |
| max_Sigma_P_profile_2_LL_bound   | 1.00       | 1.00       | 0.69        |
| rho_MLE                          | 0.03       | 0.03       | 0.03        |
| gamma_MLE                        | 0.06       | 0.06       | 0.14        |
| sigma_P_MLE                      | 0.00       | 0.07       | 0.00        |
| N_0_MLE                          | 5281842.00 | 5301405.00 | 5301405.00  |
| MLE_R_naught_act                 | 1.17       | 1.13       | 1.10        |
| min_R_naught_act_2LL             | 1.13       | 1.10       | 1.09        |
| max_R_naught_act_2LL             | 1.24       | 1.16       | 1.14        |
| min_sigma_P_2_LL                 | 0.00       | 0.07       | 0.00        |
| max_sigma_P_2_LL                 | 1.00       | 0.86       | 0.69        |
| min_rho_2_LL                     | 0.02       | 0.02       | 0.02        |
| max_rho_2_LL                     | 0.04       | 0.04       | 0.04        |
| min_Sigma_P_profile_2_LL_bound.1 | 0.00       | 0.00       | 0.00        |
| max_Sigma_P_profile_2_LL_bound.1 | 1.00       | 1.00       | 0.69        |

Table 2: Comparison of Key Parameter Values (MLE Estimates and 2LL Profile Boundaries) for  $R_0$ ,  $N_0$ ,  $\rho$ ,  $\gamma$ , and process noise parameter  $\sigma_P$  between several models without immigration (SIR Cosine Model , SIR Spline Model, and SEIR Spline Model). Note that  $\gamma$  is a fixed parameter.

### 1.3 Table ST3

|                       | SEIR_Spline                  | SIR_Spline                  | SIR_Cosine                  |
|-----------------------|------------------------------|-----------------------------|-----------------------------|
| Csnippet_file_path    | Csnippet_SEIR_spline_model.R | Csnippet_SIR_spline_model.R | Csnippet_SIR_cosine_model.R |
| Pfilter_likelihood    | -165.5741                    | -165.5022                   | -165.8260                   |
| Pfilter_likelihood_se | 0.01204600                   | 0.01580957                  | 0.01059077                  |
| AIC                   | 347.1482                     | 345.0043                    | 345.6520                    |
| Num_est_parameters    | 8                            | 7                           | 7                           |
| num_years             | 2.5                          | 2.5                         | 2.5                         |

Table 3: Likelihood Comparison and AIC scores between several models without immigration (SIR Cosine Model, SIR Spline Model, and SEIR Spline Model) with likelihoods calculated over 2 and a half years of dengue case data.
